# Supplementary material
Source: PubMed Central journal article supplement (PMC1482581)

| Gene                         | Polymorphism |            |           |           |        |       |       |       |       |       |       |       |       |       |       |       |       |       |       |       |       |       |
|------------------------------|--------------|------------|-----------|-----------|--------|-------|-------|-------|-------|-------|-------|-------|-------|-------|-------|-------|-------|-------|-------|-------|-------|-------|
|                              | hCV11354048  | 0.884      |           |           |        |       |       |       |       |       |       |       |       |       |       |       |       |       |       |       |       |       |
| IFNAR2                       | rs2300370    | 0.406      | 0.709     |           |        |       |       |       |       |       |       |       |       |       |       |       |       |       |       |       |       |       |
| IFNAR2                       | rs2248412    | 0.357      | 0.564     | 0.521     |        |       |       |       |       |       |       |       |       |       |       |       |       |       |       |       |       |       |
| IFNAR2                       | rs3153       | 0.618      | 0.581     | 0.859     | 0.305  |       |       |       |       |       |       |       |       |       |       |       |       |       |       |       |       |       |
| IFNAR2                       | f8s          | 0.639      | 0.519     | 0.878     | 0.019  | 0.917 |       |       |       |       |       |       |       |       |       |       |       |       |       |       |       |       |
| IFNAR2                       | f10v         | 0.592      | 0.481     | 0.613     | 0.200  | 0.857 | 0.728 |       |       |       |       |       |       |       |       |       |       |       |       |       |       |       |
| IFNAR2                       | a285t        | 0.017      | 0.584     | 0.414     | 0.198  | 0.529 | 0.315 | 0.510 |       |       |       |       |       |       |       |       |       |       |       |       |       |       |
| IL10RB                       | k47e         | 0.744      | 1.000     | 0.121     | 0.059  | 0.371 | 0.655 | 0.018 | 0.601 |       |       |       |       |       |       |       |       |       |       |       |       |       |
| IL10RB                       | ca1          | 0.071      | 0.132     | 0.093     | 0.145  | 0.078 | 0.270 | 0.062 | 0.035 | 0.183 |       |       |       |       |       |       |       |       |       |       |       |       |
| IL10RB                       | ca2          | 0.050      | 0.088     | 0.123     | 0.111  | 0.282 | 0.166 | 0.166 | 0.107 | 0.127 | 0.222 |       |       |       |       |       |       |       |       |       |       |       |
| IL10RB                       | 1165         | 0.006      | 0.072     | 0.001     | 0.035  | 0.089 | 0.054 | 0.091 | 0.022 | 0.386 | 0.147 | 0.030 |       |       |       |       |       |       |       |       |       |       |
| IL10RB                       | 1797         | 0.011      | 0.060     | 0.032     | 0.042  | 0.045 | 0.121 | 0.100 | 0.109 | 0.192 | 0.178 | 0.055 | 0.758 |       |       |       |       |       |       |       |       |       |
| IFNAR1                       | -408         | 0.023      | 0.316     | 0.041     | 0.023  | 0.106 | 0.031 | 0.165 | 0.113 | 0.053 | 0.146 | 0.270 | 0.377 | 0.094 |       |       |       |       |       |       |       |       |
| IFNAR1                       | gt           | 0.113      | 0.099     | 0.098     | 0.217  | 0.159 | 0.329 | 0.108 | 0.228 | 0.364 | 0.241 | 0.440 | 0.095 | 0.024 | 1.000 |       |       |       |       |       |       |       |
| IFNAR1                       | 17470        | 0.056      | 0.027     | 0.030     | 0.293  | 0.040 | 0.175 | 0.043 | 0.095 | 0.039 | 0.244 | 0.589 | 0.426 | 0.202 | 0.787 | 0.736 |       |       |       |       |       |       |
| IFNAR1                       | 1168v        | 0.029      | 0.001     | 0.087     | 0.073  | 0.050 | 0.160 | 0.055 | 0.251 | 0.006 | 0.305 | 0.328 | 0.450 | 0.297 | 1.000 | 0.651 | 0.742 |       |       |       |       |       |
| IFNAR1                       | ivs          | 0.165      | 0.230     | 0.152     | 0.104  | 0.204 | 0.376 | 0.128 | 0.079 | 0.587 | 0.187 | 0.365 | 0.244 | 0.154 | 0.672 | 0.416 | 0.609 | 0.609 |       |       |       |       |
| IFNAR1                       | 30715        | 0.353      | 0.479     | 0.055     | 0.380  | 0.037 | 0.020 | 0.130 | 0.111 | 0.294 | 0.121 | 0.168 | 0.179 | 0.168 | 0.511 | 0.464 | 0.376 | 0.303 | 0.546 |       |       |       |
| IFNGR2                       | r64q         | 0.259      | 0.165     | 0.001     | 0.072  | 0.123 | 0.086 | 0.070 | 0.017 | 0.124 | 0.186 | 0.250 | 0.046 | 0.030 | 1.000 | 0.155 | 0.102 | 0.077 | 0.053 | 0.034 |       |       |
| IFNGR2                       | 2080         | 0.111      | 0.212     | 0.063     | 0.002  | 0.137 | 0.192 | 0.461 | 0.504 | 0.049 | 0.482 | 0.449 | 0.123 | 0.056 | 0.045 | 0.539 | 0.674 | 0.535 | 0.517 | 0.429 | 0.208 |       |
| IFNGR2                       | 2087         | 0.230      | 0.393     | 0.068     | 0.052  | 0.029 | 0.006 | 0.045 | 0.056 | 0.123 | 0.050 | 0.201 | 0.192 | 0.024 | 0.016 | 0.073 | 0.059 | 0.134 | 0.165 | 0.106 | 0.350 | 1.000 |
|                              | hCV2443221   | hCV1135404 | rs2300370 | rs2248412 | rs3153 | f8s   | f10v  | a285t | k47e  | ca1   | ca2   | 1165  | 1797  | -408  | gt    | 17470 | 1168v | ivs   | 30715 | r64q  | 2080  |       |
| Distance to next marker (bp) | 2533         | 5328       | 975       | 3974      | 4745   | 5     | 20623 | 5909  | 19874 | 6005  | 2083  | 632   | 27486 | 331   | 16809 | 1692  | 1375  | 10179 | 61067 | 22367 | 7     |       |

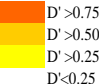

Supplement: pnas_0602800103_1.pdf [file pnas_0602800103_1.pdf]
