# Supplementary material
Source: PubMed Central journal article supplement (PMC1482581)
Supplement: pnas_0602800103_2.pdf [file pnas_0602800103_2.pdf]

**Table 1. Microsatellite markers for first round of the genome screen with logarithm of odds (lod) >1 (SIBPAIR) (1)**

| Microsatellite marker | Cytogenetic location | lod screen1 | <i>P</i> value screen1 | lod screen2 | <i>P</i> value screen2 |
|-----------------------|----------------------|-------------|------------------------|-------------|------------------------|
| D1S238                | 1q31.1               | <b>1.16</b> | 0.010                  | 0.09        | 0.251                  |
| D1S425                | 1q32.3               | <b>1.20</b> | 0.009                  | 0.21        | 0.125                  |
| D14S292               | 14q32.3              | <b>1.10</b> | 0.010                  | 0.00        | 0.500                  |
| D16S503               | 16q21                | <b>1.16</b> | 0.010                  | 0.00        | 0.500                  |
| D17S1852              | 17p11.2              | <b>1.00</b> | 0.016                  | 0.00        | 0.500                  |
| D19S220               | 19q13.1              | <b>1.00</b> | 0.016                  | 0.00        | 0.500                  |
| D21S1252              | 21q22.12             | <b>1.58</b> | 0.003                  | <b>1.00</b> | 0.016                  |

Results from the second round are shown in bold.

1. Satsangi, J., Parkes, M., Louis, E., Hashimoto, L., Kato, N., Welsh, K., Terwilliger, J. D., Lathrop, G. M., Bell, J. I. & Jewell, D. P. (1996) *Nat. Genet.* **14**, 199–202.
