# Supplementary material
Source: PubMed Central journal article supplement (PMC1482581)
Supplement: pnas_0602800103_3.pdf [file pnas_0602800103_3.pdf]

**Table 2. Assay details for markers used in fine-mapping of CRF2 region**

| Gen   | Polymorphis | PCR primers                                                               | Type of Reaction | Extension primer/LDR probes                                                                                                                                       |
|-------|-------------|---------------------------------------------------------------------------|------------------|-------------------------------------------------------------------------------------------------------------------------------------------------------------------|
| IFNAR | hCV24432    | F-5'ACGTTGGATGATAATTGCTTTTACCCAG<br>R-5'ACGTTGGATGAAAGAAAGCTGGAGTAGCTG    | SNP-MassEXTEND   | 5'TTCTTTGTTCGAAATCTGCTTG                                                                                                                                          |
| IFNAR | hCV113540   | F-5'ACGTTGGATGATATAGGTCTGGTTCCTGCC<br>R-5'ACGTTGGATGCGTTATAACGCCTATCACCC  | SNP-MassEXTEND   | 5'CCTGCCTAGAGCTCTAAATC                                                                                                                                            |
| IFNAR | rs230037    | F-5'ACGTTGGATGATGCATAGCCCCAGTTTC<br>R-5'ACGTTGGATGAGTTAGAGCAGAGCTTGACG    | SNP-MassEXTEND   | 5'CAAAGGAAGAAGAAGCACCT                                                                                                                                            |
| IFNAR | rs224841    | F-5'ACGTTGGATGCTTTGTCCCTTTTCAGTTG<br>R-5'ACGTTGGATGGAACAGAAAGCAATACTGCTG  | SNP-MassEXTEND   | 5'GGGCTTCTTACTGGGCTT                                                                                                                                              |
| IFNAR | rs315       | F-5'ACGTTGGATGTAACACCTGACCTGACCTC<br>R-5'ACGTTGGATGAAGATGAAGATGTGCCACCG   | SNP-MassEXTEND   | 5'GACCTGACCTCTGACATGTGG                                                                                                                                           |
| IFNAR | F8S         | F-5'ACGTTGGATGAGCAAAGATGCTTTTGAGCC<br>R-5'ACGTTGGATGAAGCAGCACTTACCCATGAG  | SNP-MassEXTEND   | 5'GCTTTGAGCCAGAATGCCT                                                                                                                                             |
| IFNAR | F10         | F-5'AGACCAGGGCTCACTGAATAAATG<br>R-5'GGTGGTACTGGGTCCTTA                    | SNP-LDR          | P1-5'TATAGCTTTTGAGCCAGAATGCCTYCATCG (HEX)<br>P2-5'TTAAATGCTTTTGAGCCAGAATGCCTYCATCT (FAM)<br>P3-5'TCAGATCACTAATTGGTTCATGGTGTATATCAGCAAAAAA                         |
| IFNAR | A285        | F-5'GAGCAGTTGCAAGGGAAGGTAA<br>R-5'AGGAAATGGCCAGCTAAAAAGT                  | SNP-LDR          | P1-5'TTCAATCTCATTAAGTTTATTTTTATTTTTTTAGAGGCAAGGTCTCG (FAM)<br>P2-5'TTCAATCTCATTAAGTTTATTTTTATTTTTTTAGAGGCAAGGTCTCA (HEX)<br>P3-5'CTAAGGGCTGAATGCAGTGGCTATTACAGGTC |
| IL10R | K47         | F-5'CATGGGCATCTGTTTGGAG<br>R-5'GGCCACAGAAATTTCCAGACA                      | SNP-LDR          | P1-5'AATAAGTGGGAGTCACTGCTTTTGCCG (HEX)<br>P2-5'AAAATCAGTGGGAGTCACTGCTTTTGCCA (FAM)<br>P3-5'AAGGGAACCTGACTTTCACAGCTCAGTACCTAAGAA                                   |
| IL10R | 1165        | F-5'ACGTTGGATGATCTCACATCTGCCTCAGTG<br>R-5'ACGTTGGATGCTGGGAGTCTAGATGTGG    | SNP-MassEXTEND   | 5'AGGGATCAGGGCAGCAAAAC                                                                                                                                            |
| IL10R | 1797        | F-5'ACGTTGGATGACCCAGATTATGGATGGACTG<br>R-5'ACGTTGGATGAAAGTCCGTGCTCTGTGTAG | SNP-MassEXTEND   | 5'TATGGATGGACTGATCTGAAAATC                                                                                                                                        |
| IL10R | CA1         | F-5'(FAM)TGCCCAATTCAGACAAACAT<br>R-5'TGGGGCTTTGGGCAGTG                    | Microsatellite   |                                                                                                                                                                   |
| IL10R | CA2         | F-5'(HEX)GTTAAAAAGCCTAGGGAGGTCA<br>R-5'TGGGATAATGGGGACAGGAG               | Microsatellite   |                                                                                                                                                                   |
| IFNAR | -408        | F-5'ACTCCAACCCCACTGTCCA<br>R-5'CTCTAGCTAGCACCCCTTCTCCA                    | SNP-LDR          | P1-5'ATAATAATAGAGCCGGCCGGCCGACT (FAM)<br>P2-5'AATAAATAGCCGGCCGGCCGACC (HEX)<br>P3-5'AGGAGCCACCAGCCCTCAATAAAT                                                      |
| IFNAR | GT          | F-5'(FAM)CCACCAGCCCTCCGACTG<br>R-5'GCACGCGCCCTCTCTGACAC                   | Microsatellite   |                                                                                                                                                                   |
| IFNAR | 1747        | F-5'CTTCCCTGTAGTAGTGGTCT<br>R-5'CTGTAGTAGCCGTGATGT                        | SNP-LDR          | P1-5'ATAGGTTTATCATTGKTATTCTTCTTTTTTTTGGAG (HEX)<br>P2-5'TAGGTTTATCATTGKTATTCTTCTTTTTTTTGGAG (FAM)<br>P3-5'ACAGAGTTTGTCTGTGCCAGGCTG                                |
| IFNAR | L168        | F-5'AGCTTCTATCTATCTGTATG<br>R-5'TTCGCTAATTTTCTCT                          | SNP-LDR          | P1-5'AAGGCTTTGGATGGTTAAGCTTTACATATAGCTTAG (FAM)<br>P2-5'GGCTTTGGATGGTTAAGCTTTACATATAGCTTAC (HEX)<br>P3-5'TTATCTGGAAAACTCTCAGGTGTAGAAGTAAGCATTATTA                 |
| IFNAR | IVS         | F-5'(FAM)CCACAGTTCTTGGGTTTGTGTTT<br>R-5'TGAGGCAGGAGAACTCGCTGAA            | Microsatellite   |                                                                                                                                                                   |
| IFNAR | 3071        | F-5'GCAAGTCACTAAGGGCAGGTAAGC<br>R-5'GGTAGGCGGGGAAGAACAGC                  | SNP-LDR          | P1-5'AACTAGTTACAATAGCTAATAATTCTCAATTGTGCTT (HEX)<br>P2-5'ACTAGTTACAATAGCTAATAATTCTCAATTGTGCTG (FAM)<br>P3-5'CTTCTGGATATATATGTGTGGATACAAACATTTT                    |
| IFNGR | R64         | F-5'CTCCTCAGCACCCGAAGATT<br>R-5'AGAAATACCGCTACTATTTAAACTGCCCC             | SNP-LDR          | P1-5'ATAAAATAGCAGGAGGCTGTGTCTACCG (HEX)<br>P2-5'AAATAAATAGCAGGAGGCTGTGTCTACCA (FAM)<br>P3-5'AGTGCAGTTTAAATAGTAAGCCGTATTCTGTGGTAA                                  |
| IFNGR | 2080        | F-5'ACGTTGGATGACTTTGGCAATGAGCCG<br>R-5'ACGTTGGATGATACATGAAGGCCACTC        | SNP-MassEXTEND   | 5'CACACAACCTGTCCAGCGA                                                                                                                                             |
| IFNGR | 2087        | F-5'ACGTTGGATGCCATGGATGACATGAAGGG<br>R-5'ACGTTGGATGACTTTGGCAATGAGCCG      | SNP-MassEXTEND   | 5'ATGTACATGAAGGCCACTC                                                                                                                                             |
