# Supplementary material
Source: PubMed Central journal article supplement (PMC1482581)
Supplement: pnas_0602800103_4.pdf [file pnas_0602800103_4.pdf]

**Table 3. Details of the transmission disequilibrium test (TDT) results for the SNPs IFN-AR2-F8S and IL-10RB-K47E**

(a) Results for IFN-AR2-F8S

| IFNAR2-F8S allele      | TRANSMIT |              | PDT |     |         |                    |
|------------------------|----------|--------------|-----|-----|---------|--------------------|
|                        | Obs      | Exp          | T   | NT  | HBsAg + | Anti-HBc +/HBsAg - |
| T (Phe)                | 293      | 281.2        | 206 | 190 | 312     | 292                |
| C (Ser)                | 21       | 32.5         | 12  | 28  | 28      | 32                 |
| Overall $\chi^2$       |          | 8.26         |     |     |         | 6.63               |
| Overall <i>P</i> value |          | <b>0.004</b> |     |     |         | <b>0.010</b>       |

(b) Results for IL-10RB-K47E

| IL10RB-K47E allele     | TRANSMIT |       | PDT |     |         |                   |
|------------------------|----------|-------|-----|-----|---------|-------------------|
|                        | Obs      | Exp   | T   | NT  | HBsAg + | Anti-HBc+/HBsAg - |
| A (Lys)                | 345      | 339.9 | 265 | 259 | 327     | 339               |
| G (Glu)                | 17       | 22.1  | 11  | 17  | 21      | 21                |
| Overall $\chi^2$       |          | 2.96  |     |     |         | 5.55              |
| Overall <i>P</i> value |          | 0.085 |     |     |         | <b>0.019</b>      |

(c) Results of haplotype analysis of IFN-AR2-F8S and IL-10RB-K47E

| F8S allele-<br>K47E allele | TRANSMIT |       |                             | PDT     |     |        |                       |                             |
|----------------------------|----------|-------|-----------------------------|---------|-----|--------|-----------------------|-----------------------------|
|                            | Obs      | Exp   | Haplotype<br><i>P</i> value | T       | NT  | HBsAg+ | Anti-<br>HBc+/HBsAg - | Haplotype<br><i>P</i> value |
| T-A<br>(Phe/Lys)           | 319.7    | 303.2 | <b>3 x 10<sup>-4</sup></b>  | 16<br>1 | 120 | 230    | 219                   | <b>0.001</b>                |
| C-A<br>(Ser/Lys)           | 26.2     | 36.9  | <b>0.001</b>                | 32      | 58  | 26     | 31                    | <b>0.021</b>                |
| T-G<br>(Phe/Glu)           | 14.6     | 21.1  | <b>0.022</b>                | 14      | 29  | 17     | 16                    | 0.079                       |
| C-G<br>(Ser/Glu)           | 1.5      | 0.9   | NS                          | 3       | 3   | 3      | 4                     | NS                          |

| F8S allele-<br>K47E allele | TRANSMIT |              |                             | PDT |    |        |                       |                             |
|----------------------------|----------|--------------|-----------------------------|-----|----|--------|-----------------------|-----------------------------|
|                            | Obs      | Exp          | Haplotype<br><i>P</i> value | T   | NT | HBsAg+ | Anti-<br>HBc+/HBsAg - | Haplotype<br><i>P</i> value |
| Overall $\chi^2$           |          | 16.59        |                             |     |    |        | 14.523                |                             |
| Overall <i>P</i><br>value  |          | <b>0.001</b> |                             |     |    |        | <b>0.002</b>          |                             |

Results shown are from family data generated using both PDT and TRANSMIT to test for transmission disequilibrium (1–3). The overall  $\chi^2$  and *P* values are shown in the final two lines of the table. All *P* values shown in bold are considered significant ( $P < 0.05$ ). The amino acids encoded by the alleles are indicated in each table. (a) Results from the analysis of IFN-AR2-F8S SNP. (b) Results from the analysis of IL-10RB-K47E SNP. (c) Results of haplotype analysis by using IFN-AR2-F8S and IL-10RB-K47E. TDT test results for each individual haplotype are presented in the indicated columns within the table, whereas the overall  $\chi^2$  and *P* values are presented as before.

1. Martin, E. R., Monks, S. A., Warren, L. L. & Kaplan, N. L. (2000) *Am. J. Hum. Genet.* **67**, 146–154.
2. Martin, E. R., Bass, M. P. & Kaplan, N. L. (2001) *Am. J. Hum. Genet.* **68**, 1065–1067.
3. Clayton, D. (1999) *Am. J. Hum. Genet.* **65**, 1170–1177.
