# Supplementary material
Source: PubMed Central journal article supplement (PMC1482581)
Supplement: pnas_0602800103_5.pdf [file pnas_0602800103_5.pdf]

**Table 4. Results using pedigree disequilibrium test (PDT) of all polymorphisms used in the fine-mapping of CRF2 region**

| Marker             | PDT (average) $\chi^2$ (df) | PDT (average) <i>P</i> value |
|--------------------|-----------------------------|------------------------------|
| hCV2443221         | 0.51                        | 0.476                        |
| hCV11354048        | 0.40                        | 0.526                        |
| rs2300370          | 0.13                        | 0.719                        |
| rs2248412          | 0.33                        | 0.565                        |
| rs3153             | 0.71                        | 0.400                        |
| <b>IFNAR2-F8S</b>  | <b>6.63</b>                 | <b>0.010</b>                 |
| IFNAR2-F10V        | 0.04                        | 0.850                        |
| IFNAR2-A285T       | 0.48                        | 0.487                        |
| <b>IL10RB-K47E</b> | <b>5.55</b>                 | <b>0.019</b>                 |
| IL10RB-CA1         | 4.05 (1)                    | 0.543                        |
| IL10RB-CA2         | 4.77 (2)                    | 0.190                        |
| IL10RB-1165        | 0.10                        | 0.750                        |
| IL10RB-1797        | 1.36                        | 0.243                        |
| IFNAR1-(-408)      | 0.18                        | 0.675                        |
| IFNAR1-GT          | 10.68 (3)                   | 0.383                        |
| IFNAR1-17470       | 0.04                        | 0.848                        |
| IFNAR1-L168V       | 0.04                        | 0.844                        |
| IFNAR1-IVS         | 1.55 (1)                    | 0.907                        |
| IFNAR1-30715       | 0.29                        | 0.590                        |
| IFNGR2-R64Q        | 2.33                        | 0.127                        |
| IFNGR2-2080        | 2.81                        | 0.094                        |
| IFNGR2-2087        | 0.18                        | 0.671                        |

Degrees of freedom are indicated if > 1. Significant *P* values ( $P < 0.05$ ) are shown in bold.

1. Dib, C., Faure, S., Fizames, C., Samson, D., Drouot, N., Vignal, A., Millasseau, P., Marc, S., Hazan, J., Seboun, E., Lathrop, M., Gyapay, G., Morissette, J. & Weissenbach, J. (1996) *Nature* **380**, 152–154.

2. Viviani, S., Jack, A., Hall, A. J., Maine, N., Mendy, M., Montesano, R. & Whittle, H. C. (1999) *Vaccine* **17**, 2946–2950.
3. Kruglyak, L., Daly, M. J., Reeve-Daly, M. P. & Lander, E. S. (1996) *Am. J. Hum. Genet.* **58**, 1347–1363.
