# Supplementary material
Source: PubMed Central journal article supplement (PMC1482581)
Supplement: pnas_0602800103_6.pdf [file pnas_0602800103_6.pdf]

**Table 5. Relative frequencies of the alleles and haplotypes of the two associated SNPs (IFN-AR2-F8S and IL-10RB-K47E) in the Gambian and Italian populations**

| Locus        | Allele/Haplotype        | The Gambia | Italy |
|--------------|-------------------------|------------|-------|
| IFN-AR2-F8S  | IFN-AR2-*F              | 89.7%      | 84.9% |
|              | IFN-AR2-*S              | 10.3%      | 15.1% |
| IL-10RB-K47E | IL-10RB-*K              | 93.9%      | 64.2% |
|              | IL-10RB-*E              | 6.1%       | 35.8% |
| Haplotypes   | IFN-AR2-*F – IL-10RB-*K | 83.7%      | 61.2% |
|              | IFN-AR2-*F – IL-10RB-*E | 5.8%       | 25.2% |
|              | IFN-AR2-*S – IL-10RB-*K | 10.3%      | 8.3%  |
|              | IFN-AR2-*S – IL-10RB-*E | 0.2%       | 5.0%  |
