# Supplementary material
Source: PubMed Central journal article supplement (PMC1482581)
Supplement: pnas_0602800103_7.pdf [file pnas_0602800103_7.pdf]

**Table 6. Primer details for the analysis of the relative quantification of transcript levels in heterozygotes for the IFN-AR2 and IL-10RB genes**

| Gene   | Polymorphism | PCR primers                        | Extension primer       |
|--------|--------------|------------------------------------|------------------------|
| IFNAR2 | F8S_RNAv1    | F-5'ACGTTGGATGCAAAGATGCTTTTGAGCCAG | 5'TTGAGCCAGAATGCCT     |
|        |              | R-5'ACGTTGGATGAACACGAGGCTGATATACAC |                        |
| IFNAR2 | F8S (gDNA)   | F-5'ACGTTGGATGAGCAAAGATGCTTTTGAGCC | 5'GCTTTTGAGCCAGAATGCCT |
|        |              | R-5'ACGTTGGATGAAGCAGCACTTACCCATGAG |                        |
| IL10RB | K47E_RNAv1   | F-5'ACGTTGGATGACTGAGCTGTGAAAGTCAGG | 5'GAAAGTCAGGTTCCCTT    |
|        |              | R-5'ACGTTGGATGCTCCCGAAAATGTCAGAATG |                        |
| IL10RB | K47E (gDNA)  | F-5'ACGTTGGATGCATTCTACAGTGGGAGTCAC | 5'GGAGTCACCTGCTTTTGCC  |
|        |              | R-5'ACGTTGGATGACCTTAGGTACTGAGCTGTG |                        |
